# Supplementary material for: Prioritizing functional phosphorylation sites based on multiple feature integration
Source: PubMed Central journal article supplement (PMC4835696; doi:10.1038/srep24735), 2016-04-19
Supplement: srep24735-s1.pdf [file srep24735-s1.pdf]

## **Supplementary Information**

### **Prioritizing functional phosphorylation sites based on multiple feature integration**

**Qingyu Xiao<sup>1,2\*</sup>, Benpeng Miao<sup>1,2\*</sup>, Jie Bi<sup>1,2</sup>, Zhen Wang<sup>#1</sup>, Yixue Li<sup>#1,3</sup>**

1 Key Lab of Computational Biology, CAS-MPG Partner Institute for Computational Biology, Shanghai Institutes for Biological Sciences, Chinese Academy of Sciences, Shanghai, P. R. China

2 University of Chinese Academy of Sciences, Beijing, P. R. China

3 Shanghai Center for Bioinformation Technology, Shanghai Industrial Technology Institute, Shanghai, P. R. China

\* These authors contributed equally to this work.

# Correspondence should be addressed to Zhen Wang ([zwang01@sibs.ac.cn](mailto:zwang01@sibs.ac.cn)) and Yixue Li ([yxli@sibs.ac.cn](mailto:yxli@sibs.ac.cn)).



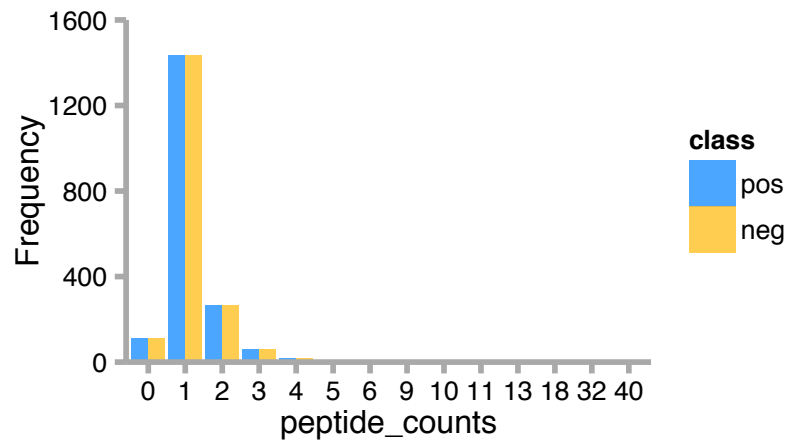

**Supplementary Figure 2. Distributions of the number of homologous proteins in human for the positive and negative datasets are the same.**

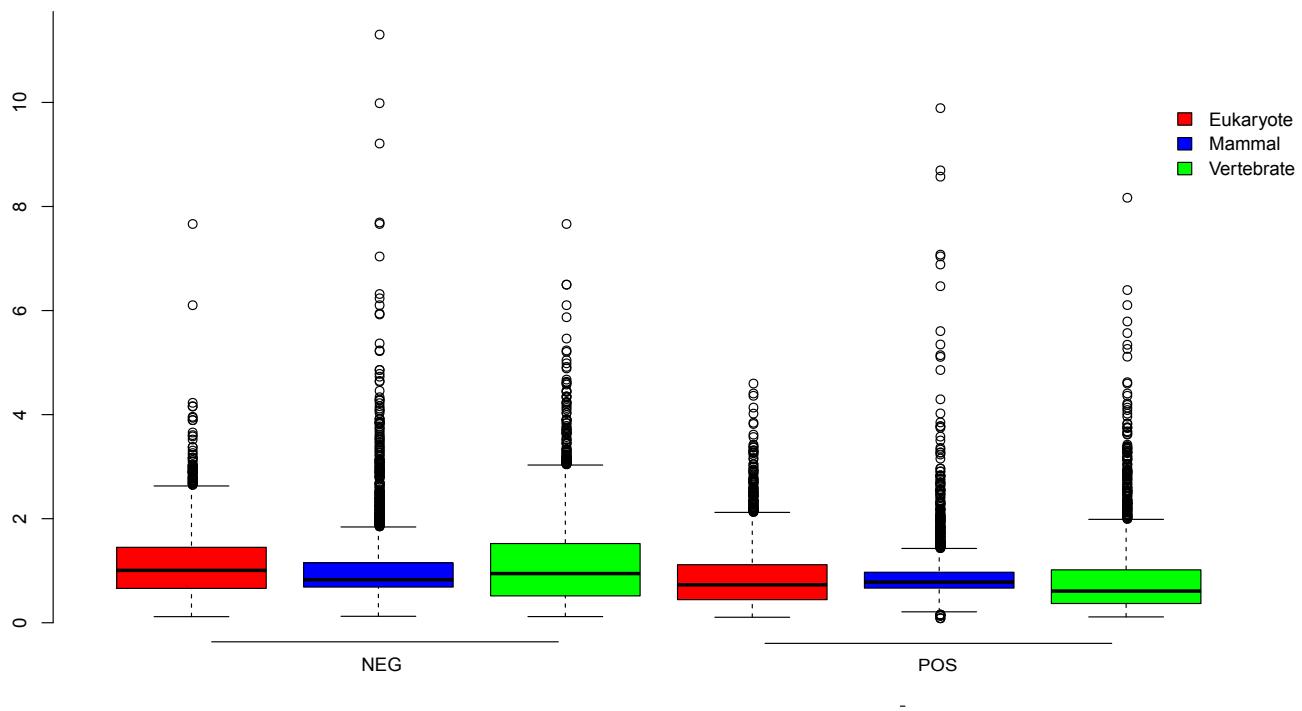

**Supplementary Figure 3. The evolutionary rates of the three different groups.** The three evolutionary rates were different among the groups.

POS: positive dataset; NEG: negative dataset.

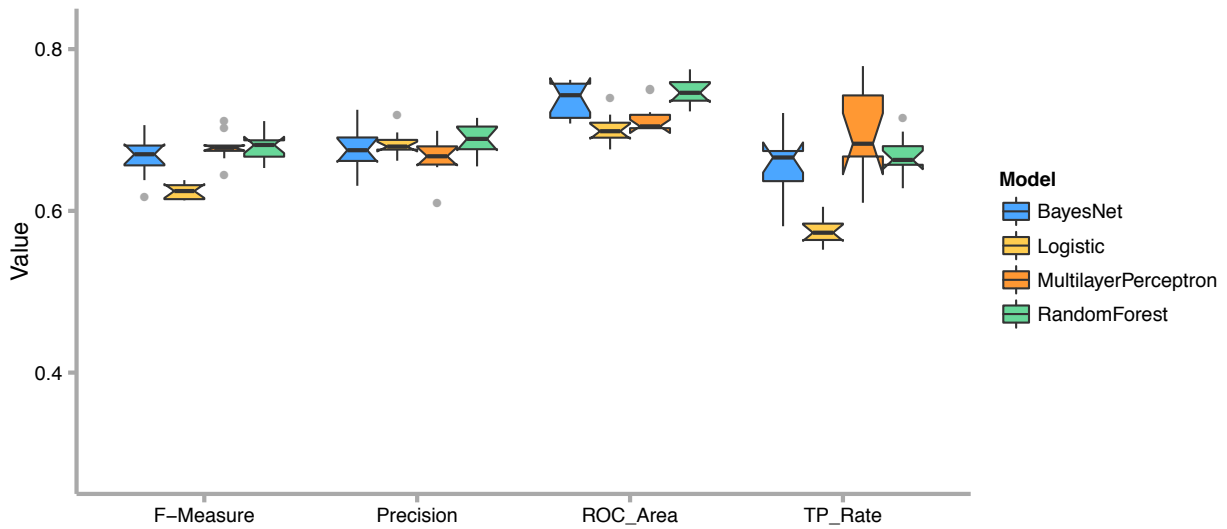

**Supplementary Figure 4. The boxplot of different models' performance (F-Measure, Precision, ROC Area and TP rate) on training set during 10 times cross-validation. Notch shows the median confidence interval. Different models' performances are robust and comparable.**

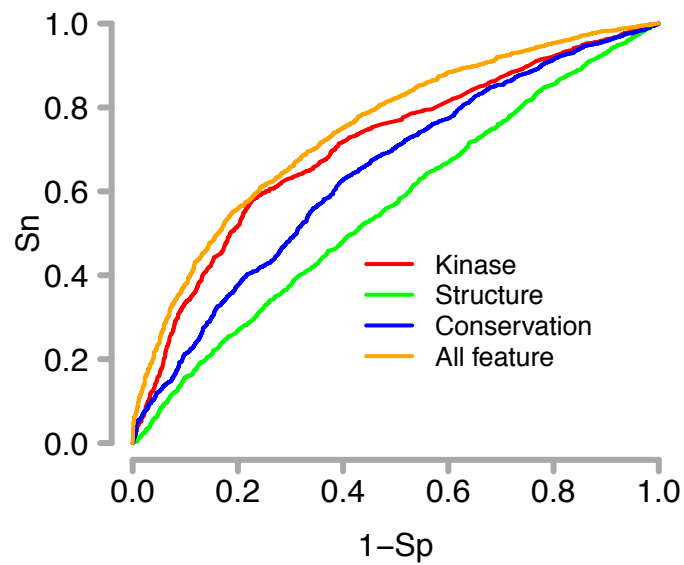

**Supplementary Figure 5. The ROC curve using different feature groups.** Random forest model was built based on each feature group with the same training data and parameters. From the area under ROC curve, each feature group's relative contribution/predictive ability could be evaluated. The model reached the best performance when using all features together.

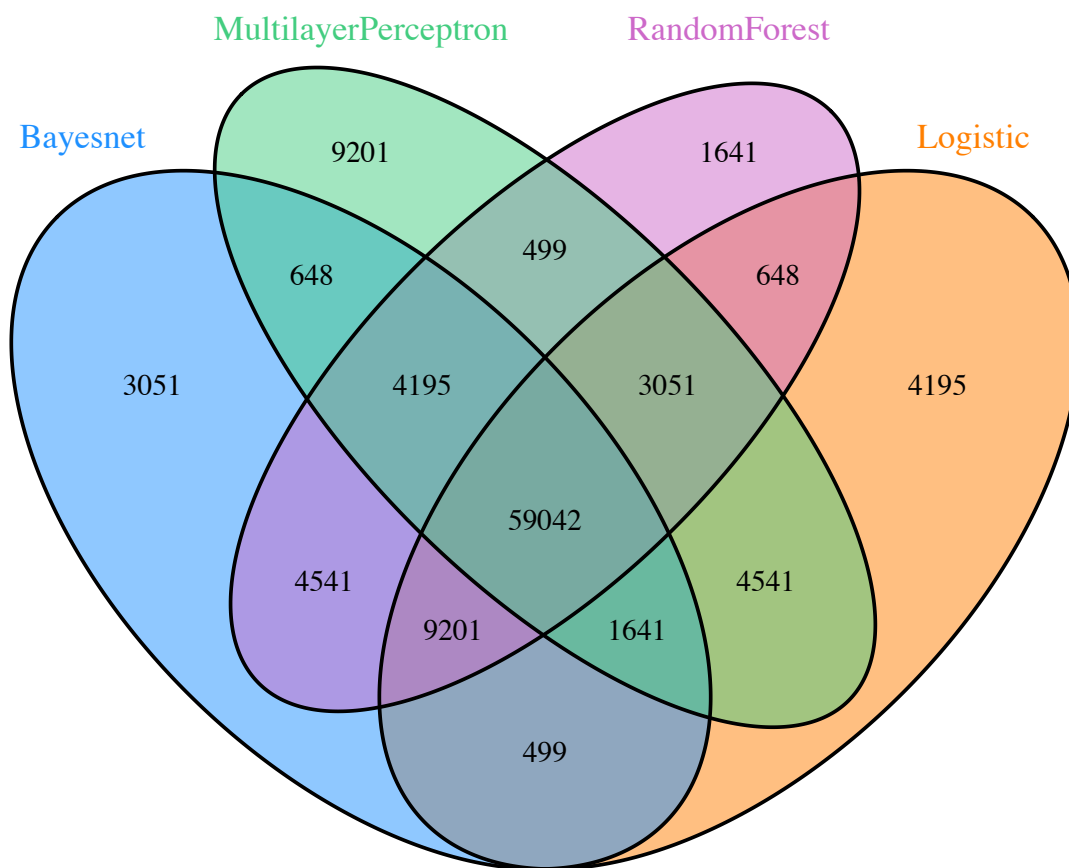

**Supplementary Figure 6. The Venn diagram of different models' prediction results for high-quality phosphosites (84,818). The results of different models show good accordance.**

**Supplementary Table 1. The numbers of status conservative sites in the positive and negative datasets.**

| peptide length | class | position 1 |     | position 2 |     | position 3 |     | position 4 |     | position 5 |     | position 6 |     | position 7 |     | position 8 |     | position 9 |     | position 10 |     |
|----------------|-------|------------|-----|------------|-----|------------|-----|------------|-----|------------|-----|------------|-----|------------|-----|------------|-----|------------|-----|-------------|-----|
|                |       | no         | yes | no         | yes | no         | yes | no         | yes | no         | yes | no         | yes | no         | yes | no         | yes | no         | yes | no          | yes |
| 11             | neg   | 1846       | 63  | 1843       | 66  | 1839       | 70  | 1835       | 74  | 1834       | 75  | 1834       | 75  | 1834       | 75  | 1834       | 75  | 1834       | 75  | 1834        | 75  |
|                | pos   | 1805       | 104 | 1800       | 109 | 1795       | 114 | 1788       | 121 | 1785       | 124 | 1785       | 124 | 1785       | 124 | 1785       | 124 | 1785       | 124 | 1785        | 124 |
| 13             | neg   | 1791       | 86  | 1785       | 92  | 1785       | 92  | 1779       | 98  | 1776       | 101 | 1773       | 104 | 1773       | 104 | 1773       | 104 | 1773       | 104 | 1773        | 104 |
|                | pos   | 1753       | 124 | 1747       | 130 | 1745       | 132 | 1737       | 140 | 1729       | 148 | 1727       | 150 | 1727       | 150 | 1727       | 150 | 1727       | 150 | 1727        | 150 |
| 15             | neg   | 1739       | 134 | 1727       | 146 | 1722       | 151 | 1711       | 162 | 1702       | 171 | 1697       | 176 | 1692       | 181 | 1692       | 181 | 1692       | 181 | 1692        | 181 |
|                | pos   | 1711       | 162 | 1702       | 171 | 1691       | 182 | 1682       | 191 | 1671       | 202 | 1666       | 207 | 1660       | 213 | 1660       | 213 | 1660       | 213 | 1660        | 213 |
| 17             | neg   | 1677       | 192 | 1659       | 210 | 1644       | 225 | 1626       | 243 | 1612       | 257 | 1605       | 264 | 1593       | 276 | 1590       | 279 | 1590       | 279 | 1590        | 279 |
|                | pos   | 1665       | 204 | 1648       | 221 | 1640       | 229 | 1627       | 242 | 1611       | 258 | 1603       | 266 | 1597       | 272 | 1594       | 275 | 1594       | 275 | 1594        | 275 |
| 19             | neg   | 1629       | 246 | 1602       | 273 | 1579       | 296 | 1556       | 319 | 1540       | 335 | 1531       | 344 | 1516       | 359 | 1510       | 365 | 1507       | 368 | 1507        | 368 |
|                | pos   | 1615       | 260 | 1589       | 286 | 1569       | 306 | 1552       | 323 | 1538       | 337 | 1527       | 348 | 1521       | 354 | 1513       | 362 | 1506       | 369 | 1506        | 369 |
| 21             | neg   | 1577       | 295 | 1534       | 338 | 1503       | 369 | 1472       | 400 | 1450       | 422 | 1436       | 436 | 1419       | 453 | 1406       | 466 | 1399       | 473 | 1393        | 479 |
|                | pos   | 1549       | 323 | 1520       | 352 | 1494       | 378 | 1468       | 404 | 1450       | 422 | 1427       | 445 | 1412       | 460 | 1401       | 471 | 1394       | 478 | 1392        | 480 |
| 23             | neg   | 1513       | 349 | 1468       | 394 | 1434       | 428 | 1394       | 468 | 1371       | 491 | 1354       | 508 | 1327       | 535 | 1307       | 555 | 1297       | 565 | 1287        | 575 |
|                | pos   | 1475       | 387 | 1434       | 428 | 1405       | 457 | 1370       | 492 | 1343       | 519 | 1314       | 548 | 1300       | 562 | 1291       | 571 | 1276       | 586 | 1269        | 593 |
| 25             | neg   | 1461       | 407 | 1403       | 465 | 1360       | 508 | 1317       | 551 | 1295       | 573 | 1270       | 598 | 1246       | 622 | 1224       | 644 | 1211       | 657 | 1197        | 671 |
|                | pos   | 1441       | 427 | 1390       | 478 | 1360       | 508 | 1330       | 538 | 1294       | 574 | 1263       | 605 | 1236       | 632 | 1217       | 651 | 1202       | 666 | 1194        | 674 |
| 27             | neg   | 1426       | 441 | 1366       | 501 | 1319       | 548 | 1266       | 601 | 1235       | 632 | 1209       | 658 | 1182       | 685 | 1164       | 703 | 1150       | 717 | 1133        | 734 |
|                | pos   | 1394       | 473 | 1335       | 532 | 1290       | 577 | 1250       | 617 | 1207       | 660 | 1173       | 694 | 1149       | 718 | 1132       | 735 | 1114       | 753 | 1104        | 763 |
| 29             | neg   | 1399       | 480 | 1320       | 559 | 1268       | 611 | 1212       | 667 | 1172       | 707 | 1140       | 739 | 1108       | 771 | 1082       | 797 | 1065       | 814 | 1046        | 833 |
|                | pos   | 1375       | 504 | 1305       | 574 | 1250       | 629 | 1210       | 669 | 1161       | 718 | 1127       | 752 | 1103       | 776 | 1085       | 794 | 1061       | 818 | 1046        | 833 |

peptide length: the residue window as the query peptide for BLAST research

position: alignment positions to calculate the status conservation

yes: the number of conservative sites

no: the number of non-conservative sites

neg: negative dataset

pos: positive dataset



**Supplementary Table 2. The p-values of status conservation between the positive and negative datasets.**

| peptide length | position 1 | position 2 | position 3 | position 4 | position 5 | position 6 | position 7 | position 8 | position 9 | position 10 |
|----------------|------------|------------|------------|------------|------------|------------|------------|------------|------------|-------------|
| 11             | 0.00155    | 0.00115    | 0.00116    | 0.00072    | 0.00047    | 0.00047    | 0.00047    | 0.00047    | 0.00047    | 0.00047     |
| 13             | 0.00859    | 0.01046    | 0.00721    | 0.00603    | 0.00255    | 0.00345    | 0.00345    | 0.00345    | 0.00345    | 0.00345     |
| 15             | 0.10199    | 0.15886    | 0.08501    | 0.11737    | 0.10164    | 0.10569    | 0.09874    | 0.09874    | 0.09874    | 0.09874     |
| 17             | 0.55881    | 0.60857    | 0.88060    | 1.00000    | 1.00000    | 0.96260    | 0.88967    | 0.89016    | 0.89016    | 0.89016     |
| 19             | 0.53436    | 0.58218    | 0.68890    | 0.89652    | 0.96604    | 0.89950    | 0.86780    | 0.93416    | 1.00000    | 1.00000     |
| 21             | 0.23459    | 0.58372    | 0.74355    | 0.90496    | 1.00000    | 0.75792    | 0.81937    | 0.88004    | 0.88063    | 1.00000     |
| 23             | 0.12787    | 0.19228    | 0.28105    | 0.38888    | 0.31965    | 0.15622    | 0.34997    | 0.59252    | 0.47819    | 0.54823     |
| 25             | 0.45537    | 0.65130    | 1.00000    | 0.66573    | 1.00000    | 0.83360    | 0.75518    | 0.83658    | 0.78433    | 0.94565     |
| 27             | 0.23803    | 0.27243    | 0.31794    | 0.60056    | 0.35297    | 0.23335    | 0.27957    | 0.29717    | 0.24106    | 0.34980     |
| 29             | 0.39343    | 0.61873    | 0.55534    | 0.97281    | 0.73671    | 0.68906    | 0.89452    | 0.94735    | 0.92135    | 1.00000     |

peptide length: the residue window as the query peptide for BLAST research

position: alignment positions to calculate the status conservation

**Supplementary Table 3. Validation of whether the “polymorphic but not associated with diseases” rule for the negative sites was reasonable.**

| <b>Model</b>                             | <b>Random Forest</b> | <b>BayesNet</b> | <b>Logistic</b> | <b>Multilayer Perceptron</b> |
|------------------------------------------|----------------------|-----------------|-----------------|------------------------------|
| Predicted positive sites*                | 13883                | 13772           | 14749           | 14878                        |
| Predicted positive sites passed the rule | 499                  | 501             | 512             | 566                          |
| p-value (chi-squared test)               | 1.12E-04             | 2.95E-04        | 3.55E-06        | 4.47E-03                     |

Total high-quality phosphosites: 82818; sites passed the rule: 3595.

\*false positive rate = 0.1
